# Supplementary material for: Data quality assessment of the Enhanced Gonococcal Antimicrobial Surveillance Programme (EGASP), Thailand, 2015–2021
Source: PubMed Central journal article supplement (PMC11226028; doi:10.1371/journal.pone.0305296), 2024-07-05
Supplement: pone.0305296.s001.pdf [file pone.0305296.s001.pdf]

S1 Table. EGASP cases and *N. gonorrhoeae* cases divided by calendar year and EGASP data overlapping of audit cycle, Thailand, 2015 – 2020.

| Year/month                                    | 2015           | 2016    | 2017      | 2018    | 2019       | 2020   | Total Cases |  |               |  |
|-----------------------------------------------|----------------|---------|-----------|---------|------------|--------|-------------|--|---------------|--|
| Urethritis (EGASP) cases/Site/Year (BH/SCC)   | 132/19         | 838/265 | 431/213   | 466/121 | 499/102    | 345/62 | 3493        |  |               |  |
| Total urethritis (EGASP)/Year                 | 151            | 1103    | 644       | 587     | 601        | 407    |             |  |               |  |
| <i>N. gonorrhoeae</i> cases/site/Year(BH/SCC) | 69/9           | 494/119 | 276/100   | 290/68  | 196/54     | 115/28 | 1818        |  |               |  |
| Total <i>N. gonorrhoeae</i> cases/Year        | 78             | 613     | 376       | 358     | 250        | 143    |             |  |               |  |
| Audit cycle                                   | Cycle 1        |         | Cycle 2   |         | Cycle 3    |        | Cycle 4     |  | Cycle 5       |  |
| Number of audited cases                       | 70             |         | 162       |         | 85         |        | 68          |  | 46            |  |
| Month of audit                                | September 2016 |         | June 2018 |         | April 2019 |        | June 2020   |  | November 2021 |  |
|                                               |                |         |           |         |            |        |             |  | 431           |  |

Abbreviations: BH = Bangrak Hospital, SCC= Silom Community Clinic@TropMed,
