# Supplementary material for: Data quality assessment of the Enhanced Gonococcal Antimicrobial Surveillance Programme (EGASP), Thailand, 2015–2021
Source: PubMed Central journal article supplement (PMC11226028; doi:10.1371/journal.pone.0305296), 2024-07-05
Supplement: pone.0305296.s002.pdf [file pone.0305296.s002.pdf]

**S2 Table. Laboratory data.**

| Data Characteristics                                                                       | Discordance n/N |         |         |         |         |
|--------------------------------------------------------------------------------------------|-----------------|---------|---------|---------|---------|
|                                                                                            | Cycle-1         | Cycle-2 | Cycle-3 | Cycle-4 | Cycle-5 |
|                                                                                            | (N= 70)         | (N=162) | (N=85)  | (N=68)  | (N= 46) |
| 1. EGASP number                                                                            | 0               | 0       | 0       | 1       | 0       |
| 2. Visit Date (DD/MM/YYYY)                                                                 | 0               | 1       | 1       | 0       | 0       |
| 3. Gram stain result from urethral swab (at clinic)                                        | 0               | 1       | 0       | 0       | 0       |
| 4. Morphologically typical colonies                                                        | 35              | 0       | 0       | 0       | 1       |
| 5. Final Identification                                                                    | 0               | 0       | 0       | 0       | 3       |
| 6. Isolation storage date                                                                  | 0               | 5       | 3       | 0       | 0       |
| 7. NG Isolates available for AST after re-culture from freezing media (growth, no growth). | 34              | 0       | 1       | 16      | 0       |
| 8. CRO value                                                                               | 0               | 0       | 0       | 0       | 1       |
| 9. CFM value                                                                               | 0               | 0       | 0       | 0       | 0       |
| 10. AZI value                                                                              | 0               | 0       | 0       | 0       | 0       |
| 11. GEN value                                                                              | 0               | 0       | 0       | 0       | 1       |
| 12. CIP value                                                                              | 0               | 1       | 0       | 0       | 0       |
| 13. AST report date                                                                        | 0               | 0       | 0       | 0       | 0       |
| 14. Initial alert date/by                                                                  | 1               | 0       | 0       | 0       | 0       |
| 15. Repeat initial alert tests within 5 working days                                       | 1               | 0       | 0       | 0       | 0       |

**S2 Table. Laboratory data (cont).**

| Data Characteristics                                                                                               | Concordance n/N    |                    |                   |                   |                    |
|--------------------------------------------------------------------------------------------------------------------|--------------------|--------------------|-------------------|-------------------|--------------------|
|                                                                                                                    | Cycle-1<br>(N= 70) | Cycle-2<br>(N=162) | Cycle-3<br>(N=85) | Cycle-4<br>(N=68) | Cycle-5<br>(N= 46) |
| 1. EGASP number                                                                                                    | 70/70              | 162/162            | 85/85             | 67/68             | 46/46              |
| 2. Visit Date<br>(DD/MM/YYYY)                                                                                      | 70/70              | 161/162            | 84/85             | 68/68             | 46/46              |
| 3. Gram stain result<br>from urethral swab (at<br>clinic)                                                          | 70/70              | 161/162            | 85/85             | 68/68             | 46/46              |
| 4. Morphologically typical<br>colonies                                                                             | 35/70              | 162/162            | 85/85             | 68/68             | 45/46              |
| 5. Final Identification                                                                                            | 70/70              | 162/162            | 85/85             | 68/68             | 43/46              |
| 6. Isolation storage date                                                                                          | 70/70              | 157/162            | 82/85             | 68/68             | 46/46              |
| 7. NG Isolates available<br>for AST after re-culture<br>from freezing media<br>(growth, no growth,<br>contaminate) | 36/70              | 162/162            | 84/85             | 52/68             | 46/46              |
| 8. CRO value                                                                                                       | 70/70              | 162/162            | 85/85             | 68/68             | 45/46              |
| 9. CFM value                                                                                                       | 70/70              | 162/162            | 85/85             | 68/68             | 46/46              |
| 10. AZI value                                                                                                      | 70/70              | 162/162            | 85/85             | 68/68             | 46/46              |
| 11. GEN value                                                                                                      | 70/70              | 162/162            | 85/85             | 68/68             | 45/46              |
| 12. CIP value                                                                                                      | 70/70              | 161/162            | 85/85             | 68/68             | 46/46              |
| 13. AST report date                                                                                                | 70/70              | 162/162            | 85/85             | 68/68             | 46/46              |
| 14. Initial alert date/by                                                                                          | 69/70              | 162/162            | 85/85             | 68/68             | 46/46              |
| 15. Repeat initial alert<br>tests within 5 working<br>days                                                         | 69/70              | 162/162            | 85/85             | 68/68             | 46/46              |

S2 Table. Laboratory data (cont).

| Data Characteristics                                                                                               | Concordance %      |                    |                   |                   |                    | Cycle-1/2                   |                    | Cycle-2/3                   |                    | Cycle-3/4                   |                    | Cycle-4/5                   |                    |
|--------------------------------------------------------------------------------------------------------------------|--------------------|--------------------|-------------------|-------------------|--------------------|-----------------------------|--------------------|-----------------------------|--------------------|-----------------------------|--------------------|-----------------------------|--------------------|
|                                                                                                                    | Cycle-1<br>(N= 70) | Cycle-2<br>(N=162) | Cycle-3<br>(N=85) | Cycle-4<br>(N=68) | Cycle-5<br>(N= 46) | OR (CI)                     | Fisher<br>exact P- | OR (CI)                     | Fisher<br>exact P- | OR (CI)                     | Fisher<br>exact P- | OR (CI)                     | Fisher<br>exact P- |
| 1. EGASP number                                                                                                    | 100                | 100                | 100               | 98.5              | 100                | 1.006<br>(0.994 -<br>1.018) | 1.000              | 0.994<br>(0.982 -<br>1.006) | 1.000              | 1.015<br>(0.986 -<br>1.045) | 0.444              | 0.985<br>(0.957 -<br>1.014) | 1.000              |
| 2. Visit Date<br>(DD/MM/YYYY)                                                                                      | 100                | 99.4               | 98.8              | 100               | 100                | 1.006<br>(0.994 -<br>1.018) | 1.000              | 1.006<br>(0.980 -<br>1.032) | 1.000              | 0.988<br>(0.966 -<br>1.011) | 1.000              | N/A*                        | 1.000              |
| 3. Gram stain result<br>from urethral swab (at<br>clinic)                                                          | 100                | 99.4               | 100               | 100               | 100                | 1.006<br>(0.994 -<br>1.018) | 1.000              | 0.994<br>(0.982 -<br>1.006) | 1.000              | N/A*                        | 1.000              | N/A*                        | 1.000              |
| 4. Morphologically typical<br>colonies                                                                             | 50                 | 100                | 100               | 100               | 97.8               | 0.500<br>(0.396 -<br>0.632) | <0.001             | N/A*                        | 1.000              | N/A*                        | 1.000              | 1.022<br>(0.979 -<br>1.067) | 0.404              |
| 5. Final Identification                                                                                            | 100                | 100                | 100               | 100               | 87.4               | N/A*                        | 1.000              | N/A*                        | 1.000              | N/A*                        | 1.000              | 1.070<br>(0.991 -<br>1.155) | 0.063              |
| 6. Isolation storage date                                                                                          | 100                | 96.9               | 96.5              | 100               | 100                | 1.032<br>(1.004 -<br>1.061) | 0.326              | 1.005<br>(0.956 -<br>1.005) | 1.000              | 0.965<br>(0.926 -<br>1.005) | 0.254              | N/A*                        | 1.000              |
| 7. NG Isolates available<br>for AST after re-culture<br>from freezing media<br>(growth, no growth,<br>contaminate) | 51.4               | 100                | 98.8              | 76.5              | 100                | 0.514<br>(0.410 -<br>0.646) | <0.001             | 1.012<br>(0.989 -<br>1.036) | 0.344              | 1.292<br>(1.130 -<br>1.477) | <0.001             | 0.765<br>(0.670 -<br>0.872) | <0.001             |
| 8. CRO value                                                                                                       | 100                | 100                | 100               | 100               | 97.8               | N/A*                        | 1.000              | N/A*                        | 1.000              | N/A*                        | 1.000              | 1.022<br>(0.979 -<br>1.067) | 0.404              |
| 9. CFM value                                                                                                       | 100                | 100                | 100               | 100               | 100                | N/A*                        | 1.000              | N/A*                        | 1.000              | N/A*                        | 1.000              | N/A*                        | 1.000              |
| 10. AZI value                                                                                                      | 100                | 100                | 100               | 100               | 100                | N/A*                        | 1.000              | N/A*                        | 1.000              | N/A*                        | 1.000              | N/A*                        | 1.000              |
| 11. GEN value                                                                                                      | 100                | 100                | 100               | 100               | 97.8               | N/A*                        | 1.000              | N/A*                        | 1.000              | N/A*                        | 1.000              | 1.022<br>(0.979 -<br>1.067) | 0.404              |
| 12. CIP value                                                                                                      | 100                | 99.4               | 100               | 100               | 100                | 1.006<br>(0.994 -<br>1.018) | 1.000              | 0.994<br>(0.982 -<br>1.006) | 1.000              | N/A*                        | 1.000              | N/A*                        | 1.000              |
| 13. AST report date                                                                                                | 100                | 100                | 100               | 100               | 100                | N/A*                        | 1.000              | N/A*                        | 1.000              | N/A*                        | 1.000              | N/A*                        | 1.000              |
| 14. Initial alert date/by                                                                                          | 98.6               | 100                | 100               | 100               | 100                | 0.986<br>(0.958 -<br>1.014) | 0.302              | N/A*                        | 1.000              | N/A*                        | 1.000              | N/A*                        | 1.000              |
| 15. Repeat initial alert<br>tests within 5 working<br>days                                                         | 98.6               | 100                | 100               | 100               | 100                | 0.986<br>(0.958 -<br>1.014) | 0.302              | N/A*                        | 1.000              | N/A*                        | 1.000              | N/A*                        | 1.000              |

\*No statistics are computed, variable is a constant.
