# Supplementary material for: Data quality assessment of the Enhanced Gonococcal Antimicrobial Surveillance Programme (EGASP), Thailand, 2015–2021
Source: PubMed Central journal article supplement (PMC11226028; doi:10.1371/journal.pone.0305296), 2024-07-05
Supplement: pone.0305296.s003.pdf [file pone.0305296.s003.pdf]

**S3 Table. Clinical data.**

| Data Characteristics                         | Discordance n/N |                      |         |         |                  |
|----------------------------------------------|-----------------|----------------------|---------|---------|------------------|
|                                              | Cycle-1         | Cycle-2 <sup>*</sup> | Cycle-3 | Cycle-4 | Cycle-5          |
|                                              | (N= 70)         | (N =157)             | (N=85)  | (N=68)  | ** <b>(N=42)</b> |
| 1. EGASP number                              | 0               | 0                    | 1       | 0       | 0                |
| 2. Visit Date (DD/MM/YYYY)                   | 0               | 1                    | 1       | 0       | 0                |
| 3. Gender of sex partner                     | 7               | 8                    | 1       | 1       | 2                |
| 4. Antibiotic use in the previous 2 weeks    | 0               | 5                    | 2       | 1       | 2                |
| 5. Urethral gram stain result (only GNID)    | 2               | 1                    | 0       | 0       | 0                |
| 6. Diagnosis at current visit                | 3               | 10                   | 2       | 2       | 0                |
| 7. Primary treatment for gonorrhoea          | 10              | 1                    | 0       | 1       | 1                |
| 8. Presence of dual treatment for gonorrhoea | 10              | 3                    | 0       | 2       | 1                |

**S3 Table. Clinical data (cont).**

| Data Characteristics                         | Concordance n/N    |                                  |                   |                   |                     |
|----------------------------------------------|--------------------|----------------------------------|-------------------|-------------------|---------------------|
|                                              | Cycle-1<br>(N= 70) | Cycle-2 <sup>*</sup><br>(N =157) | Cycle-3<br>(N=85) | Cycle-4<br>(N=68) | Cycle-5<br>**(N=42) |
| 1. EGASP number                              | 70/70              | 157/157                          | 84/85             | 68/68             | 42/42               |
| 2. Visit Date<br>(DD/MM/YYYY)                | 70/70              | 156/157                          | 84/85             | 68/68             | 42/42               |
| 3. Gender of sex partner                     | 63/70              | 149/157                          | 84/85             | 67/68             | 40/42               |
| 4. Antibiotic use in the previous 2 weeks    | 70/70              | 152/157                          | 83/85             | 67/68             | 40/42               |
| 5. Urethral gram stain result (only GNID)    | 68/70              | 156/157                          | 85/85             | 68/68             | 42/42               |
| 6. Diagnosis at current visit                | 67/70              | 147/157                          | 83/85             | 66/68             | 42/42               |
| 7. Primary treatment for gonorrhoea          | 60/70              | 156/157                          | 85/85             | 67/68             | 41/42               |
| 8. Presence of dual treatment for gonorrhoea | 60/70              | 154/157                          | 85/85             | 66/68             | 41/42               |

S3 Table. Clinical data (cont).

| Data Characteristics                         | Concordance (%) |                      |         |         |         | Cycle-1/2             |                      | Cycle-2/3             |                      | Cycle-3/4             |                      | Cycle-4/5             |                      |
|----------------------------------------------|-----------------|----------------------|---------|---------|---------|-----------------------|----------------------|-----------------------|----------------------|-----------------------|----------------------|-----------------------|----------------------|
|                                              | Cycle-1         | Cycle-2 <sup>1</sup> | Cycle-3 | Cycle-4 | Cycle-5 | OR (CI)               | Fisher exact P-value | OR (CI)               | Fisher exact P-value | OR (CI)               | Fisher exact P-value | OR (CI)               | Fisher exact P-value |
|                                              | (N= 70)         | (N =157)             | (N=85)  | (N=68)  | **N=42) |                       |                      |                       |                      |                       |                      |                       |                      |
| 1. EGASP number                              | 100             | 100                  | 98.8    | 100     | 100     | N/A*                  | 1.000                | 1.012 (0.989 - 1.036) | 0.351                | 0.988 (0.966 - 1.011) | 1.000                | N/A*                  | 1.000                |
| 2. Visit Date (DD/MM/YYYY)                   | 100             | 99.4                 | 98.8    | 100     | 100     | 1.006 (0.994 - 1.019) | 1.000                | 1.005 (0.979 - 1.032) | 1.000                | 0.988 (0.966 - 1.011) | 1.000                | N/A*                  | 1.000                |
| 3. Gender of sex partner                     | 90              | 94.9                 | 98.8    | 98.5    | 95.2    | 0.948 (0.870 - 1.034) | 0.245                | 0.960 (0.920 - 1.003) | 0.166                | 1.003 (0.966 - 1.041) | 1.000                | 1.035 (0.961 - 1.114) | 0.557                |
| 4. Antibiotic use in the previous 2 weeks    | 100             | 96.8                 | 97.6    | 98.5    | 95.2    | 1.033 (1.004 - 1.063) | 0.327                | 0.991 (0.949 - 1.036) | 1.000                | 0.991 (0.948 - 1.036) | 1.000                | 1.035 (0.961 - 1.114) | 0.557                |
| 5. Urethral gram stain result (only GNID)    | 97.1            | 99.4                 | 100     | 100     | 100     | 0.978 (0.937 - 1.020) | 0.226                | 0.994 (0.981 - 1.006) | 1.000                | N/A*                  | 1.000                | N/A*                  | 1.000                |
| 6. Diagnosis at current visit                | 95.7            | 93.6                 | 97.6    | 97.1    | 100     | 1.022 (0.959 - 1.090) | 0.759                | 0.959 (0.910 - 1.011) | 0.223                | 1.006 (0.954 - 1.061) | 1.000                | 0.971 (0.931 - 1.012) | 0.524                |
| 7. Primary treatment for gonorrhoea          | 85.7            | 99.4                 | 100     | 98.5    | 97.6    | 0.863 (0.783 - 0.950) | <0.001               | 0.994 (0.981 - 1.006) | 1.000                | 1.015 (0.986 - 1.045) | 0.444                | 1.009 (0.955 - 1.067) | 1.000                |
| 8. Presence of dual treatment for gonorrhoea | 85.7            | 98.1                 | 100     | 97.1    | 97.6    | 0.874 (0.792 - 0.964) | 0.001                | 0.981 (0.960 - 1.003) | 0.554                | 1.030 (0.989 - 1.074) | 0.196                | 0.994 (0.934 - 1.059) | 1.000                |

\*No statistics are computed, variable is a constant.
