# Supplementary material for: Data quality assessment of the Enhanced Gonococcal Antimicrobial Surveillance Programme (EGASP), Thailand, 2015–2021
Source: PubMed Central journal article supplement (PMC11226028; doi:10.1371/journal.pone.0305296), 2024-07-05
Supplement: pone.0305296.s004.pdf [file pone.0305296.s004.pdf]

**S4 Table. Overall accuracy and completeness.**

| Attributes   | Data parts | Document reviews (n/N, %) |                 |                 |                 |                 | % of improvement (5 <sup>th</sup> -1 <sup>st</sup> ) | Fisher exact P-value (cycle-1/cycle-2) | Fisher exact P-value (cycle-2/cycle-3) | Fisher exact P-value (cycle-3/cycle-4) | Fisher exact P-value (cycle-4/cycle-5) |
|--------------|------------|---------------------------|-----------------|-----------------|-----------------|-----------------|------------------------------------------------------|----------------------------------------|----------------------------------------|----------------------------------------|----------------------------------------|
|              |            | 1 <sup>st</sup>           | 2 <sup>nd</sup> | 3 <sup>rd</sup> | 4 <sup>th</sup> | 5 <sup>th</sup> |                                                      |                                        |                                        |                                        |                                        |
| Accuracy     | Clinical   | 528/560, 94.3             | 1227/1256, 97.7 | 673/680, 98.9   | 537/544, 98.7   | 330/336, 98.2   | 3.9                                                  | <0.001                                 | 0.052                                  | 0.789                                  | 0.574                                  |
|              | Laboratory | 979/1050, 93.2            | 2422/2429, 99.7 | 1270/1275, 99.6 | 1003/1020, 98.3 | 684/690, 99.1   | 5.9                                                  | <0.001                                 | 0.561                                  | 0.002                                  | 0.201                                  |
| Completeness | Clinical   | 550/560, 98.2             | 1255/1256, 99.9 | 679/680, 99.9   | 542/544, 99.6   | 334/336, 99.4   | 1.2                                                  | <0.001                                 | 1.000                                  | 0.588                                  | 0.639                                  |
|              | Laboratory | 980/1050, 93.3            | 2429/2430, 99.9 | 1273/1275, 99.8 | 1004/1020, 98.4 | 686/690, 99.4   | 6.1                                                  | <0.001                                 | 0.274                                  | <0.001                                 | 0.069                                  |

| Attributes           | Document reviews (% , n/N) |           |           |           |           | Improvement (cycle-1/cycle-5) | Fisher exact P-value (cycle-1 /cycle-2) | Fisher exact P-value (cycle-2/cycle-3) | Fisher exact P-value (cycle-3/cycle-4) | Fisher exact P-value (cycle-4/cycle-5) |
|----------------------|----------------------------|-----------|-----------|-----------|-----------|-------------------------------|-----------------------------------------|----------------------------------------|----------------------------------------|----------------------------------------|
|                      | Cycle-1                    | Cycle-2   | Cycle-3   | Cycle-4   | Cycle-5   |                               |                                         |                                        |                                        |                                        |
| Overall accuracy     | 93.6,                      | 98.9,     | 99.4,     | 98.4,     | 98.8,     | 5.2                           | <0.001                                  | 0.174                                  | 0.010                                  | 0.496                                  |
|                      | 1507/1610                  | 3649/3686 | 1943/1955 | 1540/1564 | 1014/1026 |                               |                                         |                                        |                                        |                                        |
| Overall completeness | 95.0,                      | 99.9      | 99.8,     | 98.8,     | 99.4,     | 4.4                           | <0.001                                  | 0.349                                  | <0.001                                 | 0.207                                  |
|                      | 1530/1610                  | 3684/3686 | 1952/1955 | 1546/1564 | 1020/1026 |                               |                                         |                                        |                                        |                                        |
